# Supplementary material for: Crystal structure and thermodynamic properties of dinickel diphosphate dihydrate Ni2(H2O)2[P2O7]
Source: Royal Society of Chemistry journal article supplement (doi:10.1039/d0dt03505j), 2020-01-01
Supplement: d0dt03505j2.pdf [file d0dt03505j2.pdf]

## Supplementary Information

### Crystal structure and thermodynamic properties of dinickel diphosphate dihydrate $\text{Ni}_2(\text{H}_2\text{O})_2[\text{P}_2\text{O}_7]$

Galina V. Kiriukhina,<sup>\*a,b</sup> Olga V. Yakubovich,<sup>a</sup> Larisa V. Shvanskaya,<sup>a,c</sup> Yevgeniy A. Ovchenkov,<sup>a</sup> Anatoly S. Volkov,<sup>a,b</sup> Olga V. Dimitrova,<sup>a</sup> Sergey V. Simonov<sup>d</sup> and Alexander N. Vasiliev<sup>a,e</sup>

<sup>a</sup>Lomonosov Moscow State University, Moscow 119991, Russia.

<sup>b</sup>Institute of Experimental Mineralogy RAS, Chernogolovka, 142432, Russia.

<sup>c</sup>National University of Science and Technology "MISIS", Moscow 119049, Russia.

<sup>d</sup>Institute of Solid State Physics, RAS, Chernogolovka 142432, Russia.

<sup>e</sup>National Research South Ural State University, Chelyabinsk 454080, Russia.

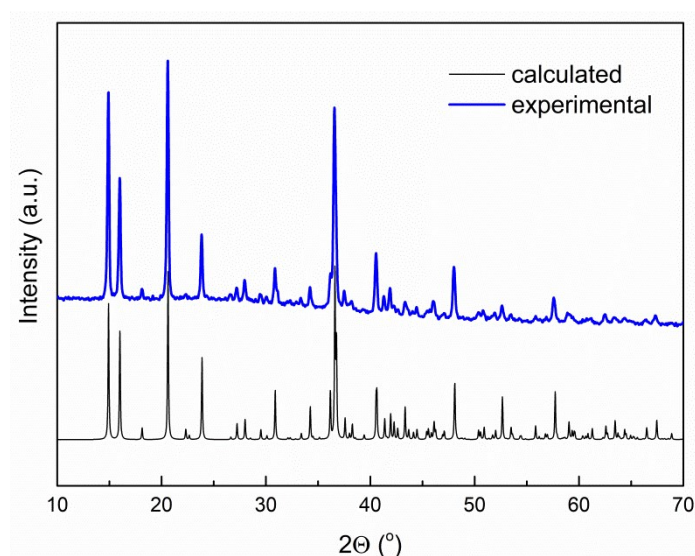

**Figure S1.** Experimental and calculated powder XRD pattern of the titled compound.

The powder XRD analysis was performed by an ADP-2 diffractometer using  $\text{CoK}\alpha$  radiation,  $\lambda=1.7903 \text{ \AA}$ . The experimental powder pattern is in agreement with the simulated one on the basis of single crystal structural data. No impurity peaks are observed.

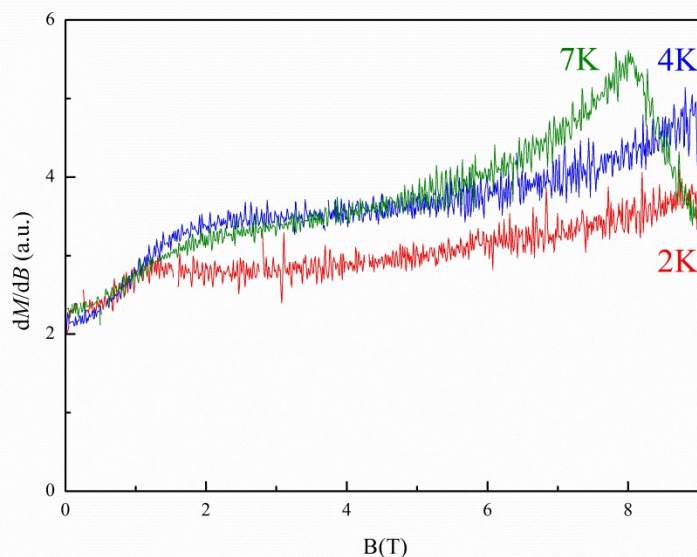

**Figure S2.** Field dependences of  $dM/dB$  in  $\text{Ni}_2(\text{H}_2\text{O})_2[\text{P}_2\text{O}_7]$  at various temperatures.

**Table S1.** *Fractional atomic coordinates and isotropic or equivalent isotropic displacement parameters (Å<sup>2</sup>)*

|     | <i>x</i>    | <i>y</i>    | <i>z</i>    | $U_{\text{iso}}^*/U_{\text{eq}}$ |
|-----|-------------|-------------|-------------|----------------------------------|
| Ni1 | 0.26753(3)  | 0.11435(2)  | 0.58497(3)  | 0.00381(6)                       |
| Ni2 | 0.04756(3)  | 0.24996(2)  | 0.85186(3)  | 0.00391(6)                       |
| P1  | 0.26032(7)  | 0.41674(3)  | 0.14949(6)  | 0.00345(9)                       |
| P2  | 0.06421(7)  | 0.31199(3)  | 0.43021(6)  | 0.00348(9)                       |
| O1  | 0.16688(18) | 0.40781(8)  | 0.34815(15) | 0.0044(2)                        |
| O2  | -           | 0.29078(9)  | 0.30787(16) | 0.0053(2)                        |
|     | 0.14062(18) |             |             |                                  |
| O3  | 0.22883(18) | 0.23073(9)  | 0.40779(16) | 0.0055(2)                        |
| O4  | 0.19582(18) | 0.02255(8)  | 0.37492(16) | 0.0057(2)                        |
| O5  | 0.08545(18) | 0.37282(8)  | 0.01641(16) | 0.0051(2)                        |
| O6  | 0.02929(19) | 0.33884(8)  | 0.62560(15) | 0.0057(2)                        |
| O7  | 0.46539(18) | 0.35650(9)  | 0.16058(16) | 0.0052(2)                        |
| O8  | 0.2576(2)   | 0.00567(9)  | 0.77691(17) | 0.0084(2)                        |
| O9  | 0.0632(2)   | 0.14883(10) | 1.06083(18) | 0.0090(2)                        |
| H1  | 0.343(5)    | -0.040(2)   | 0.802(4)    | 0.037(8)*                        |
| H2  | 0.137(5)    | -0.020(2)   | 0.772(4)    | 0.048(9)*                        |
| H3  | 0.084(6)    | 0.170(3)    | 1.166(5)    | 0.070(12)*                       |
| H4  | 0.160(7)    | 0.111(3)    | 1.039(6)    | 0.094(16)*                       |
